# Supplementary material for: Integration of metabolic databases for the reconstruction of genome-scale metabolic networks
Source: Springer Nature journal article supplement (doi:10.1186/1752-0509-4-114), 2010-08-16

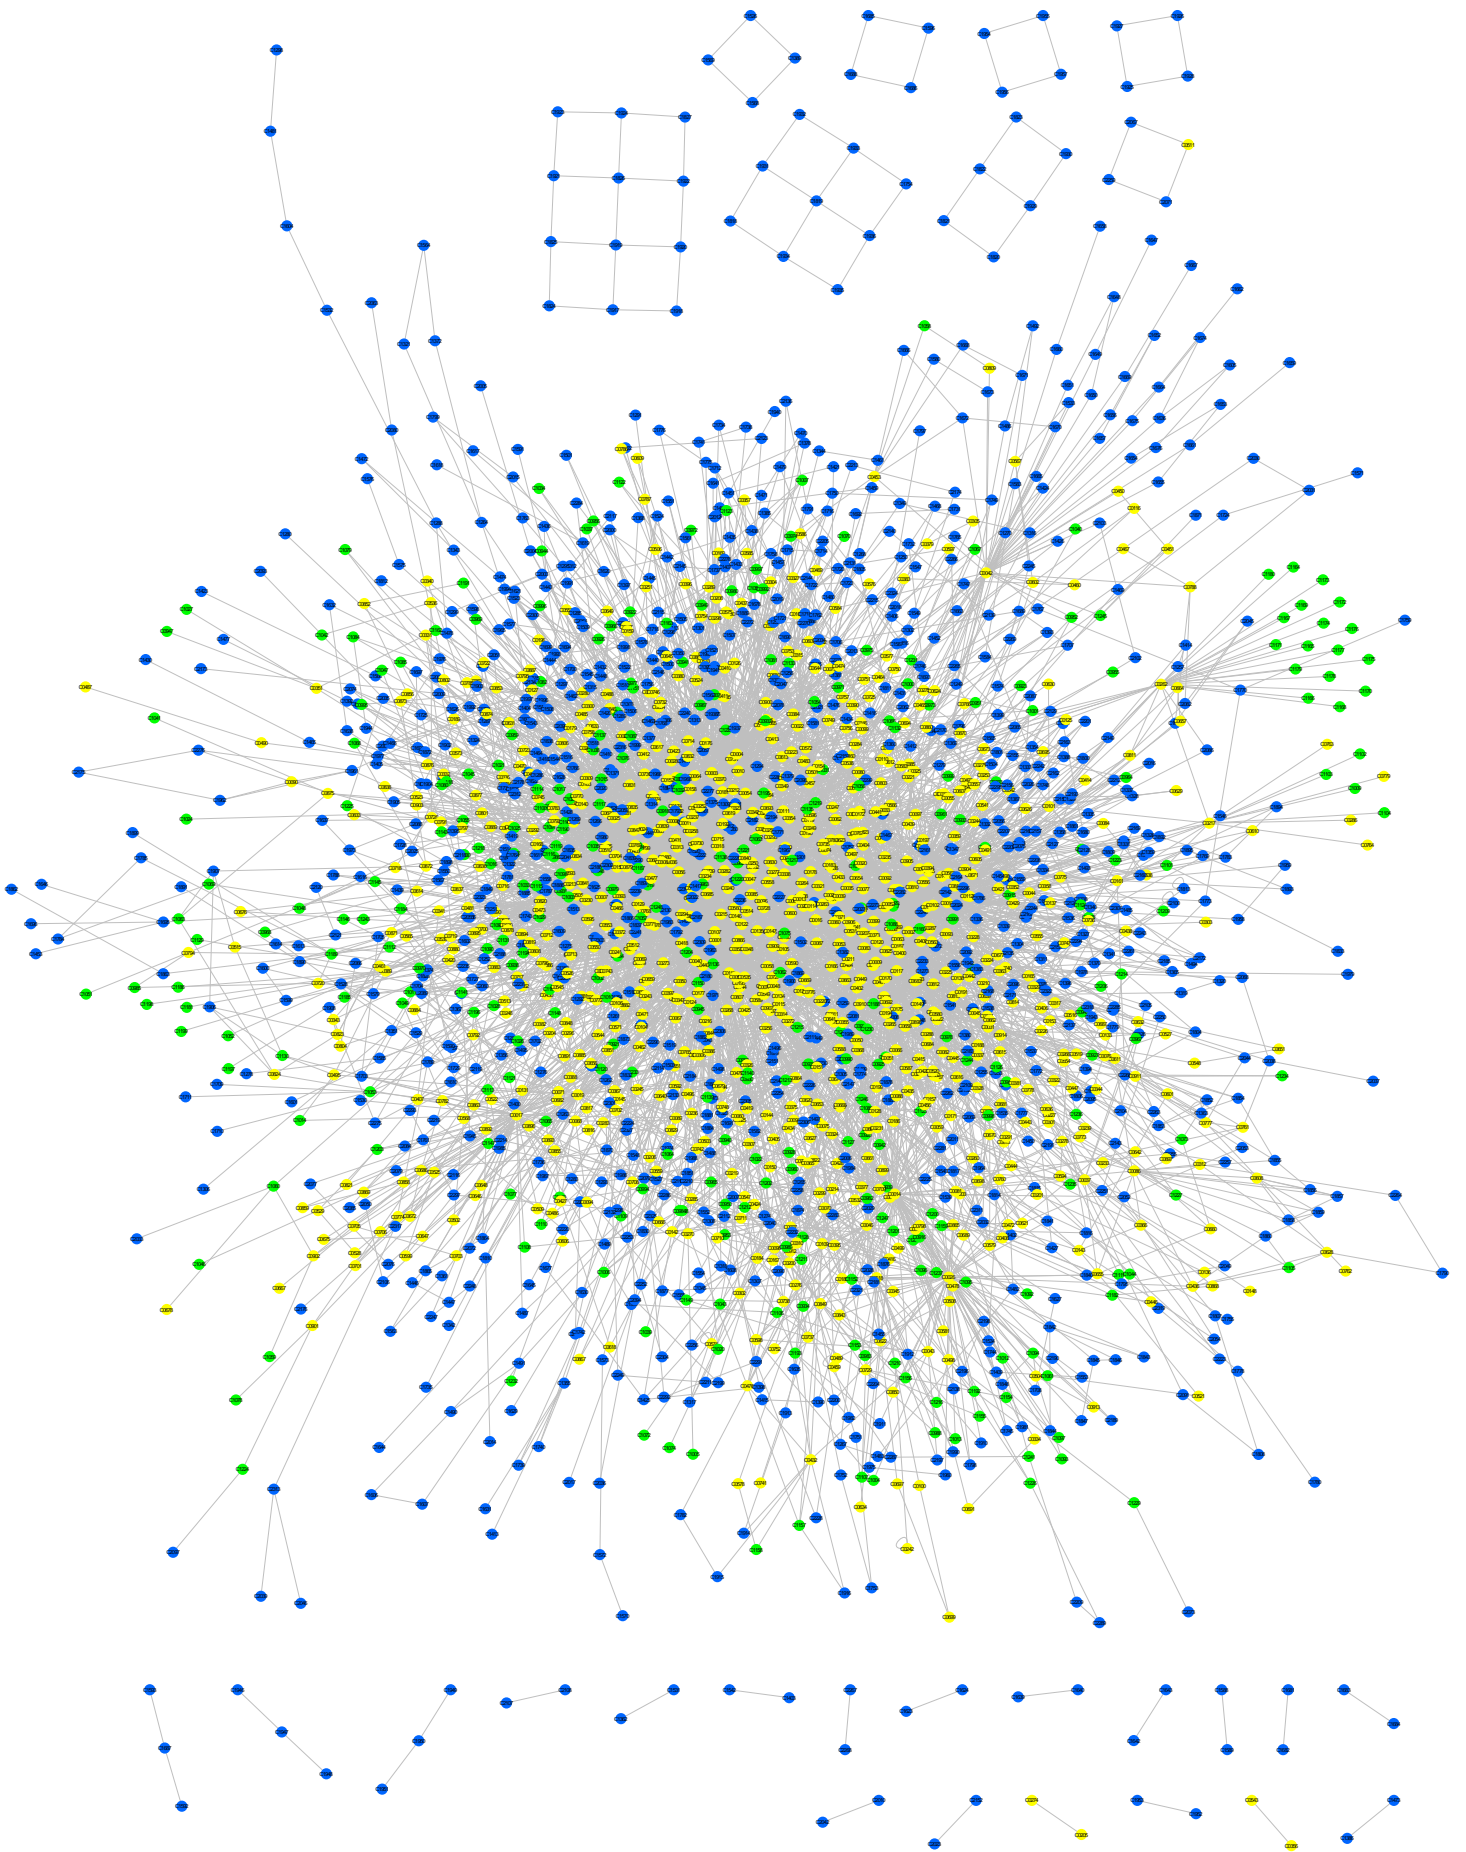

Supplement: 12918_2010_503_MOESM15_ESM.pdf [file 12918_2010_503_MOESM15_ESM.pdf]
